# Supplementary material
Source: publisher site journal article supplement (https://www.dovepress.com/article/589861)
Supplement: Supplementary file 1 [file 589861%20Supplementary%20Material.docx]

**Supplementary Table 1** Comparison of the baseline CT characteristics (CT attenuation, HU values distribution, heterogeneity) and annual HU value loss of T4 vertebra between the OVF group and the control group

| Characteristics | OVF (n=52) | Control (n=104) | *P* value |
| --- | --- | --- | --- |
| **CT Attenuation (HU, mean** **± SD)** |  |  |  |
| Anterior | 119.48 ± 45.29 | 152.63 ± 46.52 | **< 0.001** |
| Middle | 163.27 ± 52.28 | 193.83 ± 52.48 | **< 0.001** |
| Posterior | 149.89 ± 49.37 | 182.73 ± 51.81 | **< 0.001** |
| Superior | 139.89 ± 46.18 | 171.14 ± 48.30 | **< 0.001** |
| Inferior | 140.91 ± 48.70 | 174.68 ± 48.98 | **< 0.001** |
| Integral | 140.40 ± 47.04 | 172.91 ± 48.24 | **< 0.001** |
| **Distribution (Median, IQR)** |  |  |  |
| Anterior/Middle | 0.73 (0.66 – 0.81) | 0.78 (0.71 – 0.85) | **0.003** |
| Anterior/Posterior | 0.81 (0.74 – 0.89) | 0.83 (0.76 – 0.90) | 0.227 |
| Middle/Posterior | 1.08 (1.01 – 1.20) | 1.07 (0.97 – 1.14) | 0.237 |
| Superior/Inferior | 0.99 (0.96 – 1.04) | 0.98 (0.94 – 1.01) | 0.111 |
| **Heterogeneity (Median, IQR)** |  |  |  |
| CV | 0.16 (0.13 – 0.24) | 0.14 (0.11 – 0.18) | **0.009** |
| **Annual rate of HU value loss (%, Median, IQR)** |  |  |  |
| Anterior | 4.69 (0.45 – 8.44) | 2.49 (-0.09 – 5.40) | 0.074 |
| Middle | 2.89 (-0.21 – 8.06) | 2.55 (0.51 – 4.70) | 0.559 |
| Posterior | 4.14 (2.41 – 7.71) | 3.56 (1.47 – 5.43) | 0.171 |
| Superior | 4.33(0.95 – 8.60) | 3.04 (1.15 – 6.12) | 0.174 |
| Inferior | 4.49 (0.69 – 7.96) | 2.96 (0.31 – 5.55) | 0.131 |
| Integral | 4.06 (1.13 – 8.20) | 2.85 (1.07 – 5.93) | 0.132 |
| **Absolute annual HU value loss (HU, Median, IQR)** |  |  |  |
| Anterior | 5.27 (0.40 – 10.56) | 4.32 (-0.16 – 7.58) | 0.306 |
| Middle | 5.14 (-0.28 – 12.93) | 4.47 (1.09 – 9.56) | 0.756 |
| Posterior | 6.57 (3.04 – 10.34) | 6.33 (2.29 – 9.17) | 0.797 |
| Superior | 6.05 (0.72 – 11.28) | 5.09 (1.81 – 10.07) | 0.572 |
| Inferior | 5.51 (0.80 – 10.79) | 4.69 (0.76 – 8.31) | 0.372 |
| Integral | 5.76 (1.05 – 9.98) | 4.56 (1.86 – 8.94) | 0.422 |

SD, standard deviation; OVF, osteoporotic vertebral fracture; HU, Hounsfield Units; IQR, interquartile range; CV, coefficient of variation. Bold text indicates *P*<0.05.

**Supplementary Table 2** Comparison of the baseline CT characteristics (CT attenuation, HU values distribution, heterogeneity) and annual HU value loss of T7 vertebra between the OVF group and the control group

| Characteristics | OVF (n=52) | Control (n=104) | *P* value |
| --- | --- | --- | --- |
| **CT Attenuation (HU, mean** **± SD)** |  |  |  |
| Anterior | 108.68 ± 41.59 | 138.14 ± 46.31 | **< 0.001** |
| Middle | 147.41 ± 47.13 | 175.00 ± 51.19 | **0.001** |
| Posterior | 132.23 ± 46.54 | 159.74 ± 46.95 | **< 0.001** |
| Superior | 124.87 ± 42.63 | 150.45 ± 45.32 | **< 0.001** |
| Inferior | 126.83 ± 45.05 | 157.86 ± 48.29 | **< 0.001** |
| Integral | 125.85 ± 43.59 | 154.16 ± 46.51 | **< 0.001** |
| **Distribution (Median, IQR)** |  |  |  |
| Anterior/Middle | 0.73 (0.66 – 0.80) | 0.79 (0.74 – 0.85) | **0.002** |
| Anterior/Posterior | 0.82 (0.79 – 0.94) | 0.87 (0.79 – 0.94) | 0.056 |
| Middle/Posterior | 1.11 (1.00 – 1.25) | 1.10 (1.02 – 1.16) | 0.273 |
| Superior/Inferior | 0.95 (0.91 – 0.99) | 0.99 (0.94 – 1.04) | **0.003** |
| **Heterogeneity (Median, IQR)** |  |  |  |
| CV | 0.17 (0.13 – 0.22) | 0.14 (0.11 – 0.18) | **0.002** |
| **Annual rate of HU value loss (%, Median, IQR)** |  |  |  |
| Anterior | 5.54 (1.81 – 8.63) | 2.86 (0.63 – 5.73) | **0.024** |
| Middle | 4.71 (0.14 – 9.36) | 3.11 (0.30 – 5.98) | 0.121 |
| Posterior | 5.19 (0.42 – 9.01) | 3.39 (0.51 – 6.86) | 0.118 |
| Superior | 5.28 (0.74 – 10.21) | 3.01 (0.24 – 5.83) | **0.036** |
| Inferior | 5.52 (-0.26 – 9.66) | 3.01 (0.87 – 5.99) | 0.058 |
| Integral | 5.42 (1.35 –8.16) | 3.02 (0.37 – 5.95) | **0.036** |
| **Absolute annual HU value loss (HU, Median, IQR)** |  |  |  |
| Anterior | 5.44 (1.54 – 8.65) | 3.65 (0.90 –7.38) | 0.236 |
| Middle | 6.09 (0.15 – 14.47) | 4.89 (0.86 –9.34) | 0.259 |
| Posterior | 6.93 (0.53 – 11.23) | 5.01 (0.79 –9.97) | 0.299 |
| Superior | 6.15 (0.81 – 11.24) | 4.82 (0.53 – 8.50) | 0.183 |
| Inferior | 6.53 (-0.36 – 10.39) | 5.09 (0.69 –9.66) | 0.341 |
| Integral | 6.16 (1.15 – 10.77) | 4.43 (1.20 –8.81) | 0.207 |

SD, standard deviation; OVF, osteoporotic vertebral fracture; HU, Hounsfield Units; IQR, interquartile range; CV, coefficient of variation. Bold text indicates *P*<0.05.

**Supplementary Table 3** Comparison of the baseline CT characteristics (CT attenuation, HU values distribution, heterogeneity) and annual HU value loss of T10 vertebra between the OVF group and the control group

| Characteristics | OVF (n=52) | Control (n=104) | *P* value |
| --- | --- | --- | --- |
| **CT Attenuation (HU, mean** **± SD)** |  |  |  |
| Anterior | 114.53 ± 38.00 | 140.13 ± 45.12 | **< 0.001** |
| Middle | 138.05 ± 44.64 | 169.24 ± 51.06 | **< 0.001** |
| Posterior | 134.93 ± 45.44 | 168.59 ± 52.24 | **< 0.001** |
| Superior | 122.99 ± 38.66 | 150.12 ± 44.06 | **< 0.001** |
| Inferior | 131.80 ± 44.49 | 164.54 ± 52.58 | **< 0.001** |
| Integral | 127.39 ± 41.04 | 157.33 ± 47.73 | **< 0.001** |
| **Distribution (Median, IQR)** |  |  |  |
| Anterior/Middle | 0.83 (0.76 – 0.91) | 0.84 (0.76 – 0.91) | 0.934 |
| Anterior/Posterior | 0.83 (0.78 – 0.93) | 0.83 (0.75 – 0.91) | 0.375 |
| Middle/Posterior | 1.03 (0.93 – 1.09) | 1.01 (0.95 – 1.06) | 0.322 |
| Superior/Inferior | 0.92 (0.87 – 1.01) | 0.91 (0.86 – 0.98) | 0.327 |
| **Heterogeneity (Median, IQR)** |  |  |  |
| CV | 0.16 (0.12 – 0.19) | 0.15 (0.12 – 0.19) | 0.984 |
| **Annual rate of HU value loss (%, Median, IQR)** |  |  |  |
| Anterior | 3.47 (-0.09 – 9.49) | 1.22 (-3.52 – 4.33) | **0.010** |
| Middle | 5.28 (1.43 – 10.80) | 2.93 (-1.62 – 5.63) | **0.002** |
| Posterior | 4.21 (1.08 – 9.29) | 2.80 (0.28 – 5.70) | **0.034** |
| Superior | 4.53 (-0.39 – 11.55) | 2.61 (-0.97 –5.68) | **0.034** |
| Inferior | 4.88 (1.96 – 10.19) | 2.91 (-0.53 – 6.44) | **0.030** |
| Integral | 4.92 (1.57 – 10.62) | 2.75 (-0.38 – 5.48) | **0.005** |
| **Absolute annual HU value loss (HU, Median, IQR)** |  |  |  |
| Anterior | 3.63 (-0.12 – 10.42) | 1.84 (-3.90 – 6.39) | **0.030** |
| Middle | 6.89 (2.11 – 15.44) | 4.82 (-2.59 – 8.41) | **0.010** |
| Posterior | 5.54 (1.52 – 14.45) | 4.19 (0.50 – 9.29) | 0.154 |
| Superior | 6.38 (-0.51 – 13.57) | 3.55 (-1.75 – 7.52) | **0.048** |
| Inferior | 6.29 (2.60 – 12.08) | 4.16 (-0.53 – 9.20) | **0.037** |
| Integral | 6.29 (1.45 – 14.81) | 4.22 (-0.57 – 7.90) | **0.034** |

SD, standard deviation; OVF, osteoporotic vertebral fracture; HU, Hounsfield Units; IQR, interquartile range; CV, coefficient of variation. Bold text indicates *P*<0.05.

**Supplementary Table 4** Comparison of the baseline CT characteristics (CT attenuation, HU values distribution, heterogeneity) and annual HU value loss of L1 vertebra between the OVF group and the control group

| Characteristics | OVF (n=52) | Control (n=104) | *P* value |
| --- | --- | --- | --- |
| **CT Attenuation (HU, mean** **± SD)** |  |  |  |
| Anterior | 87.85 ± 40.85 | 117.91 ± 41.98 | **< 0.001** |
| Middle | 96.25 ± 44.12 | 131.53 ± 47.12 | **< 0.001** |
| Posterior | 96.99 ± 40.64 | 127.91 ± 44.34 | **< 0.001** |
| Superior | 87.79 ± 39.20 | 119.90 ± 41.91 | **< 0.001** |
| Inferior | 98.58 ± 42.90 | 129.37 ± 44.91 | **< 0.001** |
| Integral | 93.18 ± 40.51 | 124.63 ± 43.16 | **< 0.001** |
| **Distribution (Median, IQR)** |  |  |  |
| Anterior/Middle | 0.87 (0.78 – 0.99) | 0.91 (0.85 – 0.99) | 0.128 |
| Anterior/Posterior | 0.99 (0.87 – 1.11) | 1.01 (0.94 – 1.09) | 0.240 |
| Middle/Posterior | 0.91 (0.80 – 1.00) | 0.88 (0.84 – 0.95) | 0.656 |
| Superior/Inferior | 0.91 (0.83 – 0.96) | 0.93(0.88 – 0.97) | 0.126 |
| **Heterogeneity (Median, IQR)** |  |  |  |
| CV | 0.16 (0.13 – 0.25) | 0.13 (0.10 – 0.16) | **< 0.001** |
| **Annual rate of HU value loss (%, Median, IQR)** |  |  |  |
| Anterior | 7.11 (-0.48 – 14.30) | 2.97 (-0.03 – 6.41) | **0.043** |
| Middle | 4.87 (-0.50 – 8.98) | 2.53 (-1.7 – 6.41) | 0.167 |
| Posterior | 3.33 (-2.59 – 8.83) | 3.24 (-0.12 – 7.54) | 0.975 |
| Superior | 6.03 (-3.91 – 10.87) | 2.94 (-0.39 – 6.72) | 0.337 |
| Inferior | 5.95 (1.60 – 9.26) | 3.10 (-0.39 – 6.72) | **0.025** |
| Integral | 4.93 (-0.93 – 8.92) | 3.23 (-0.24 – 6.76) | 0.144 |
| **Absolute annual HU value loss (HU, Median, IQR)** |  |  |  |
| Anterior | 5.06 (-0.36 – 13.58) | 2.86 (-0.54 – 8.21) | 0.211 |
| Middle | 4.96 (-0.59 – 8.84) | 3.19 (-1.48 – 7.60) | 0.549 |
| Posterior | 3.92 (-1.88 – 9.60) | 3.58 (-0.19 – 8.93) | 0.706 |
| Superior | 3.88 (-3.45 – 11.15) | 2.95 (-0.57 – 8.01) | 0.624 |
| Inferior | 5.49 (1.39 – 8.84) | 3.15 (-0.58 – 9.54) | 0.191 |
| Integral | 4.06 (-0.005 – 9.67) | 3.24 (-0.18 – 8.74) | 0.481 |

SD, standard deviation; OVF, osteoporotic vertebral fracture; HU, Hounsfield Units; IQR, interquartile range; CV, coefficient of variation. Bold text indicates *P*<0.05.
